# Supplementary material for: Synthetic RNA–protein modules integrated with native translation mechanisms to control gene expression in malaria parasites
Source: PubMed Central journal article supplement (PMC4773503; doi:10.1038/ncomms10727), 2016-03-01
Supplement: ncomms10727-s1.pdf [file ncomms10727-s1.pdf]

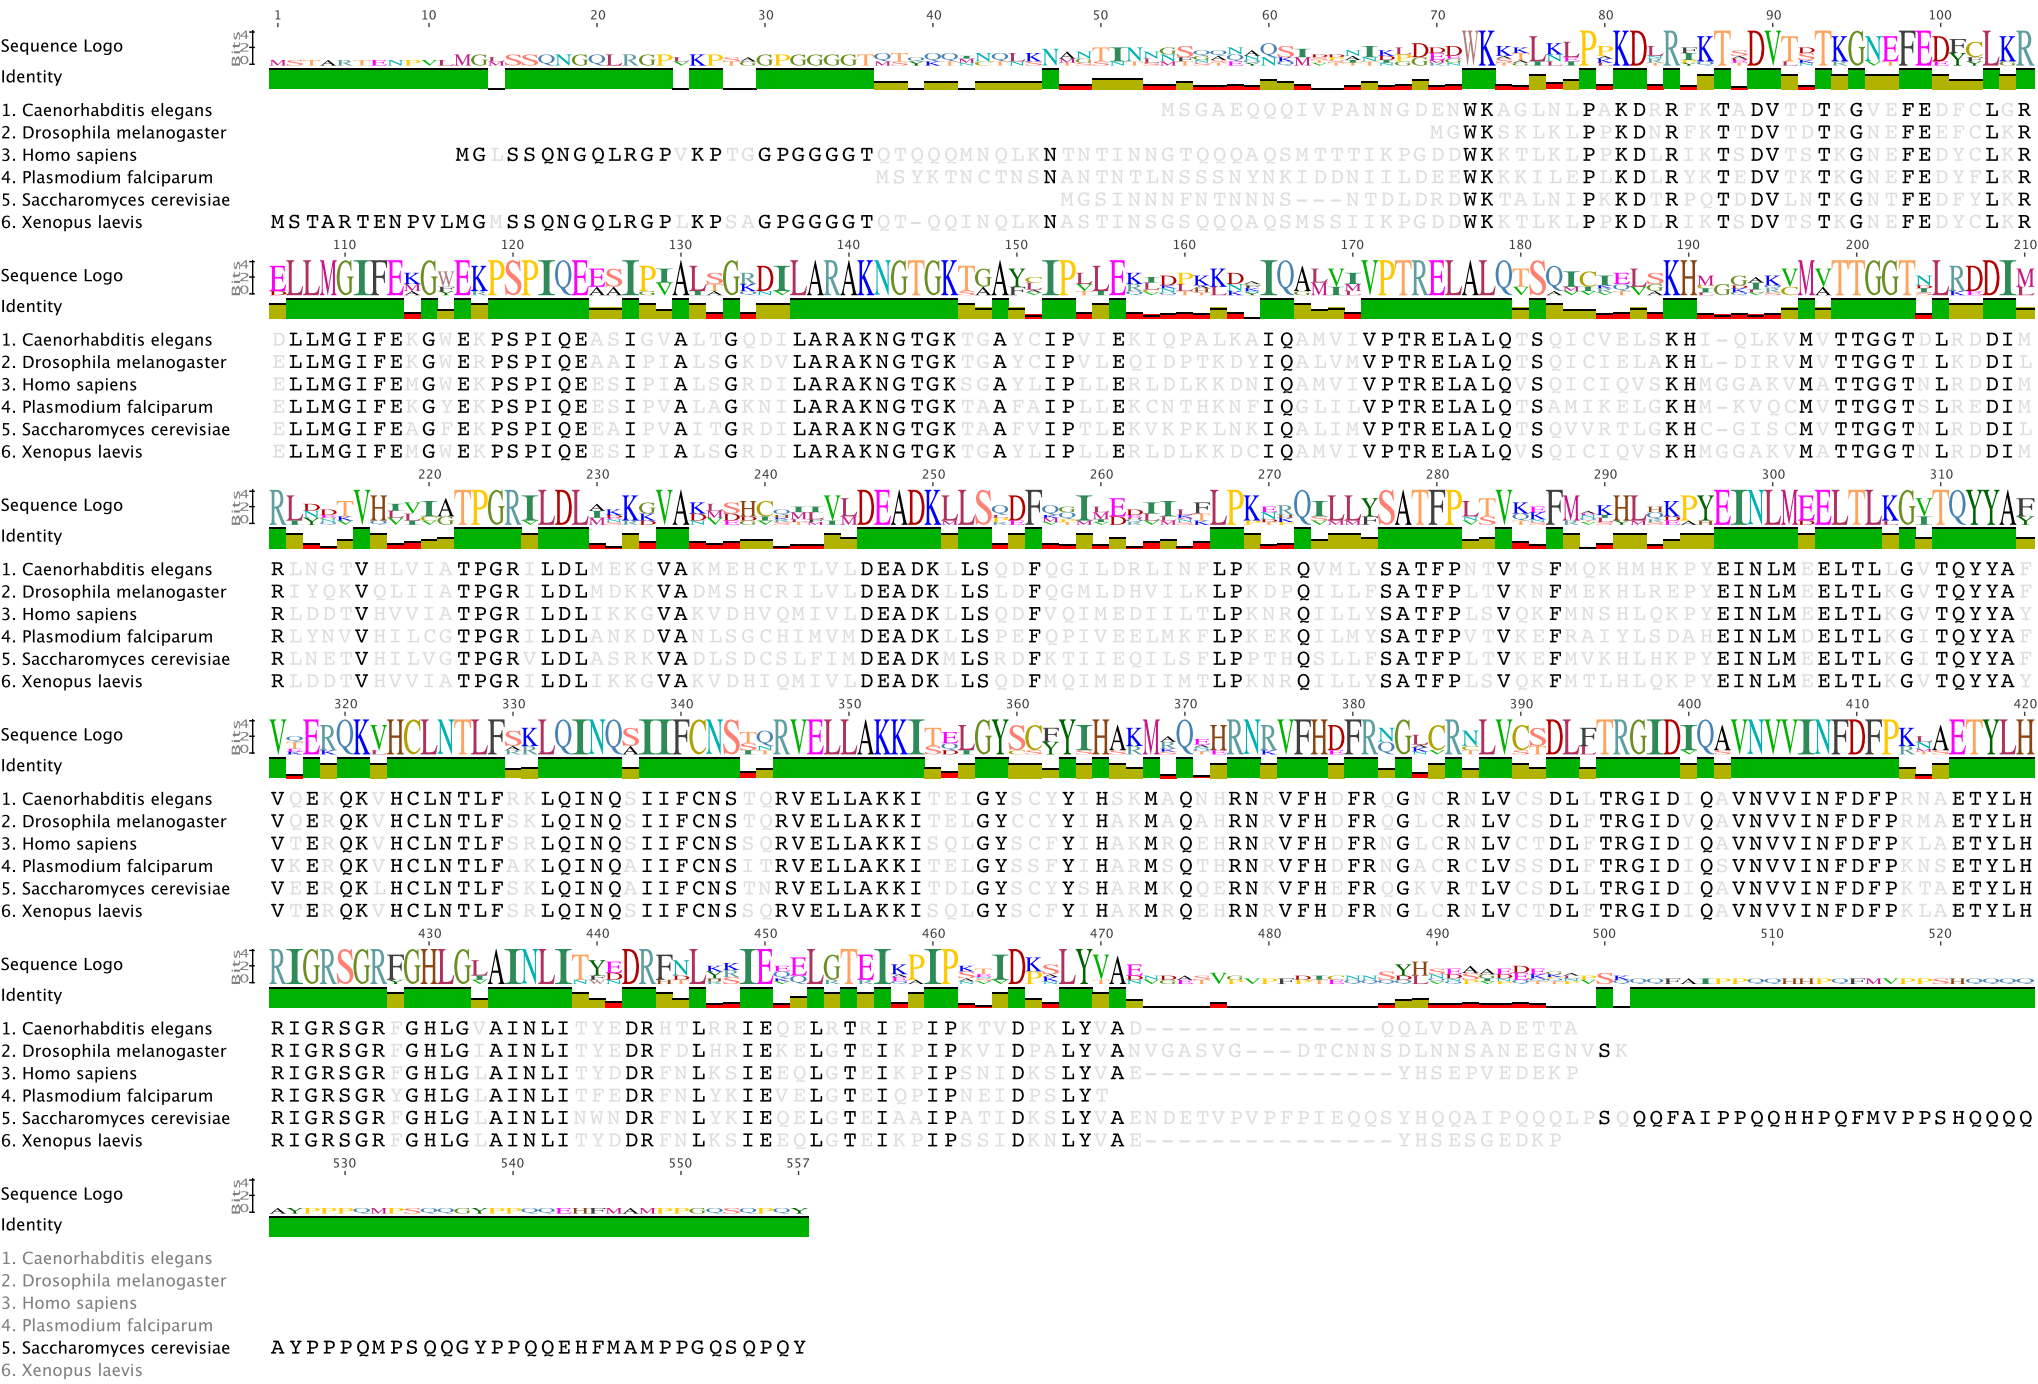

**Supplementary Figure 1a. Sequence comparison of several protein homologs from various model and non-model organisms that have been implicated in translational regulation.** MUSCLE alignments of the Dhh1p homologs from *S. cerevisiae* with those from *C. elegans*, *D. melanogaster*, *H. sapiens*, *P. falciparum* and *X. laevis*.

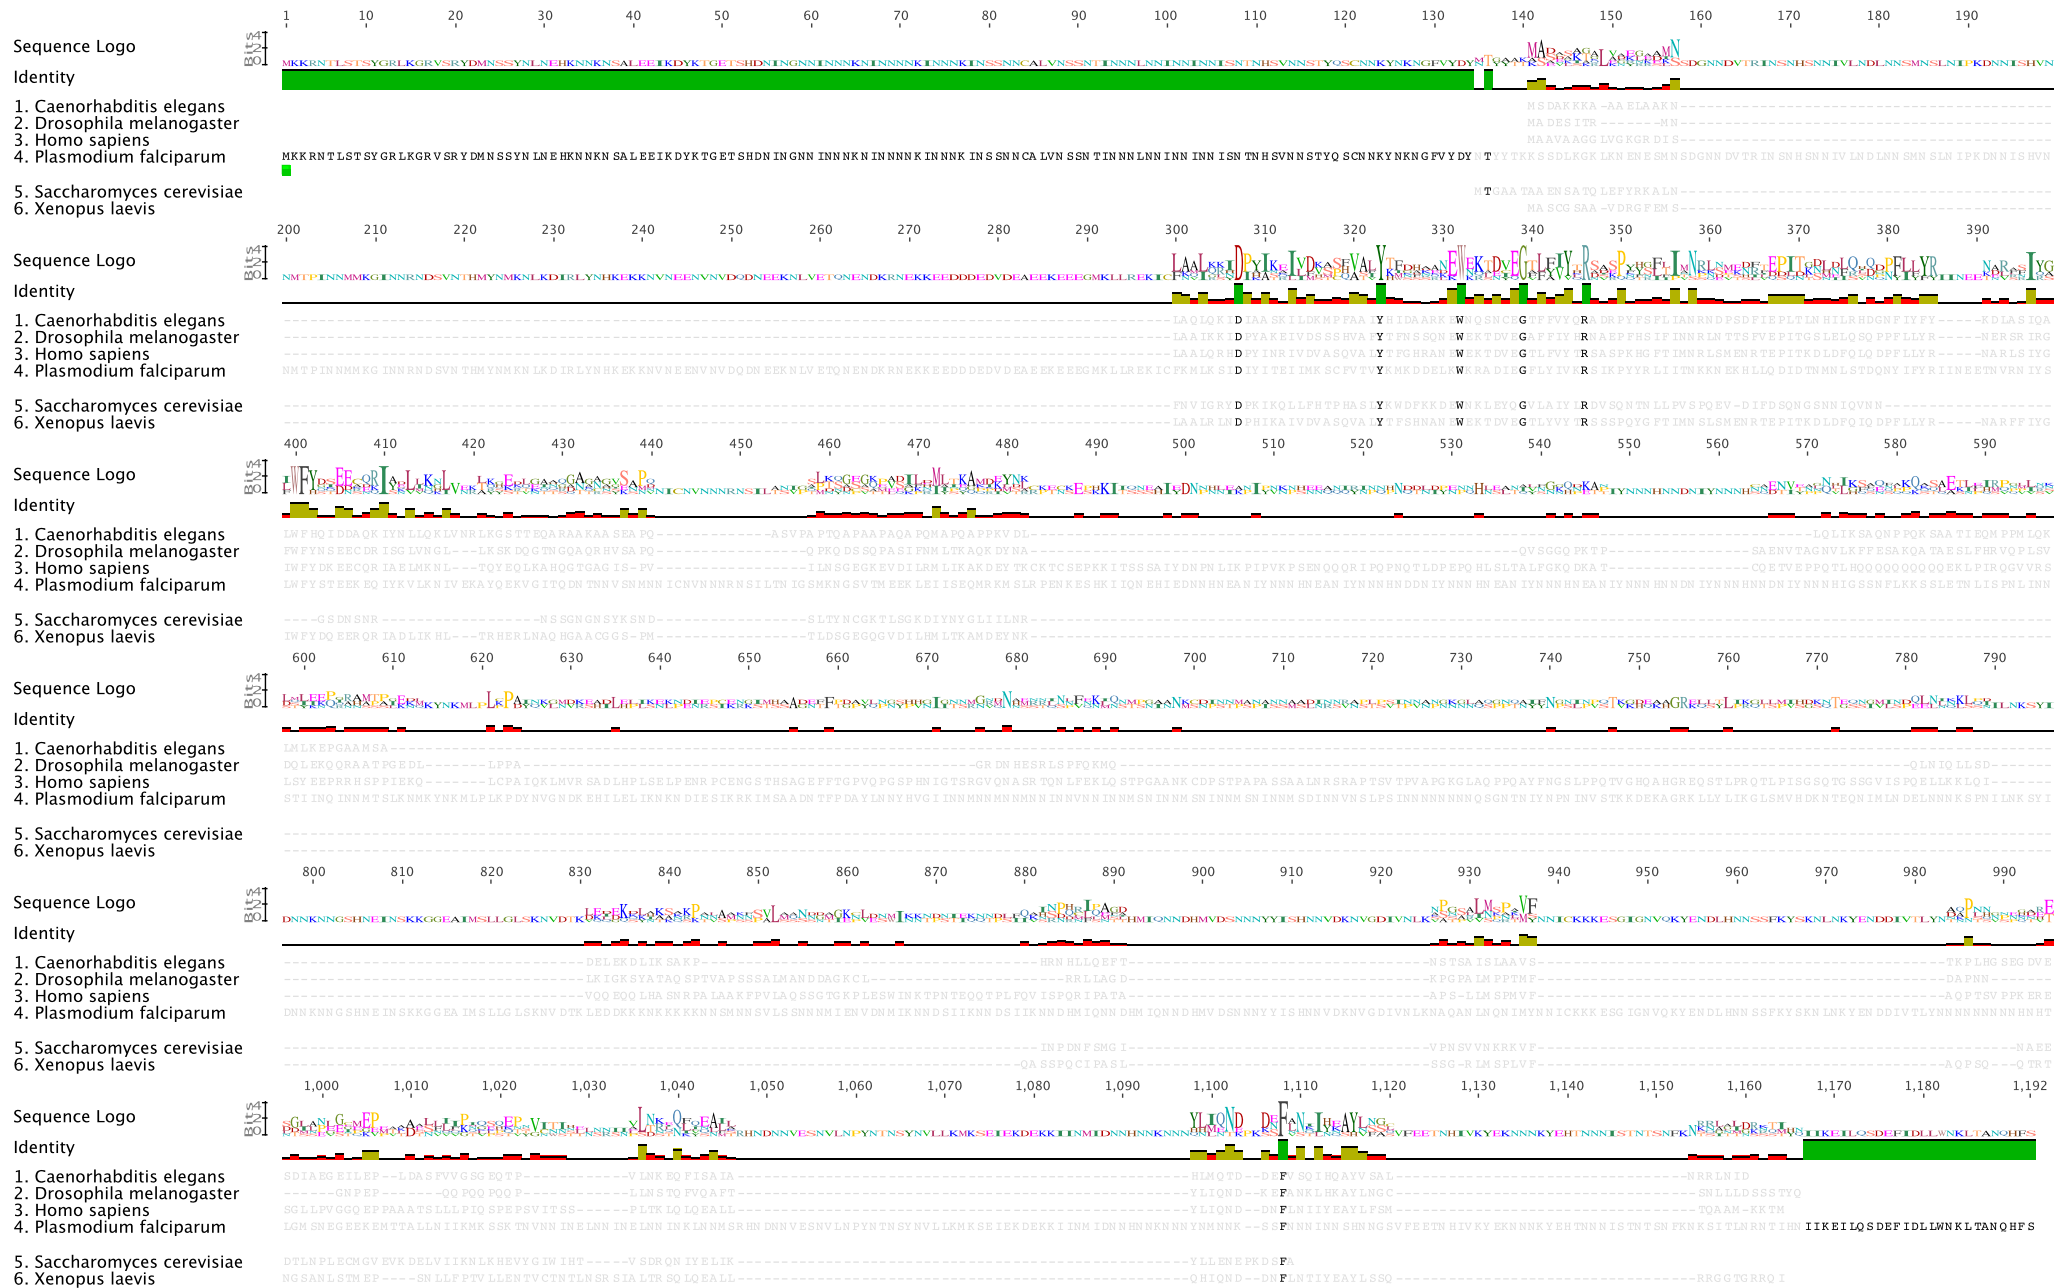

**Supplementary Figure 1b. Sequence comparison of several protein homologs from various model and non-model organisms that have been implicated in translational regulation.** MUSCLE alignments of the Dcp1p homologs from *S. cerevisiae* with those from *C. elegans*, *D. melanogaster*, *H. sapiens*, *P. falciparum* and *X. laevis*.

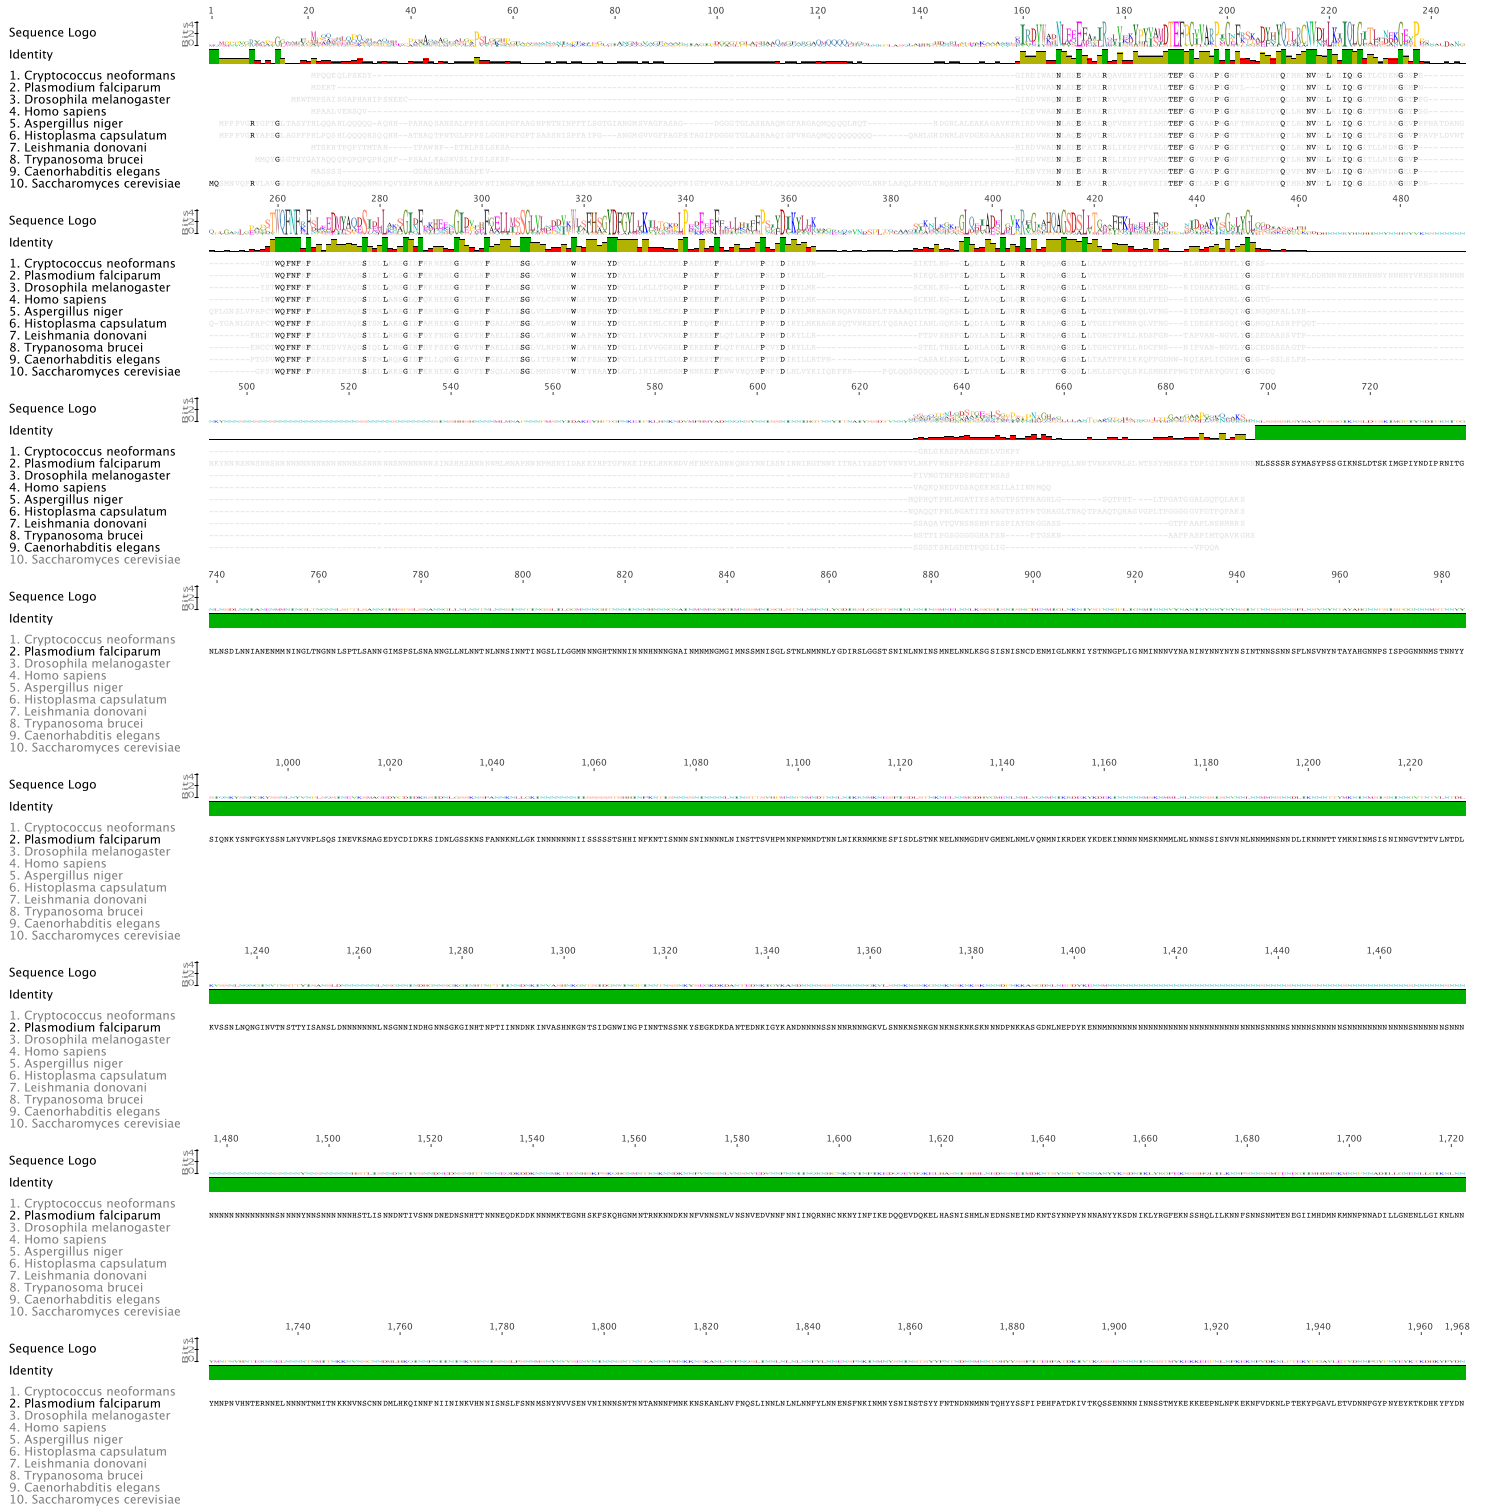

**Supplementary Figure 1c. Sequence comparison of several protein homologs from various model and non-model organisms that have been implicated in translational regulation. MUSCLE alignments of the Pop2p homologs from *S. cerevisiae* with those from *C. elegans*, *D. melanogaster*, *H. sapiens*, *P. falciparum* and *X. laevis*.**

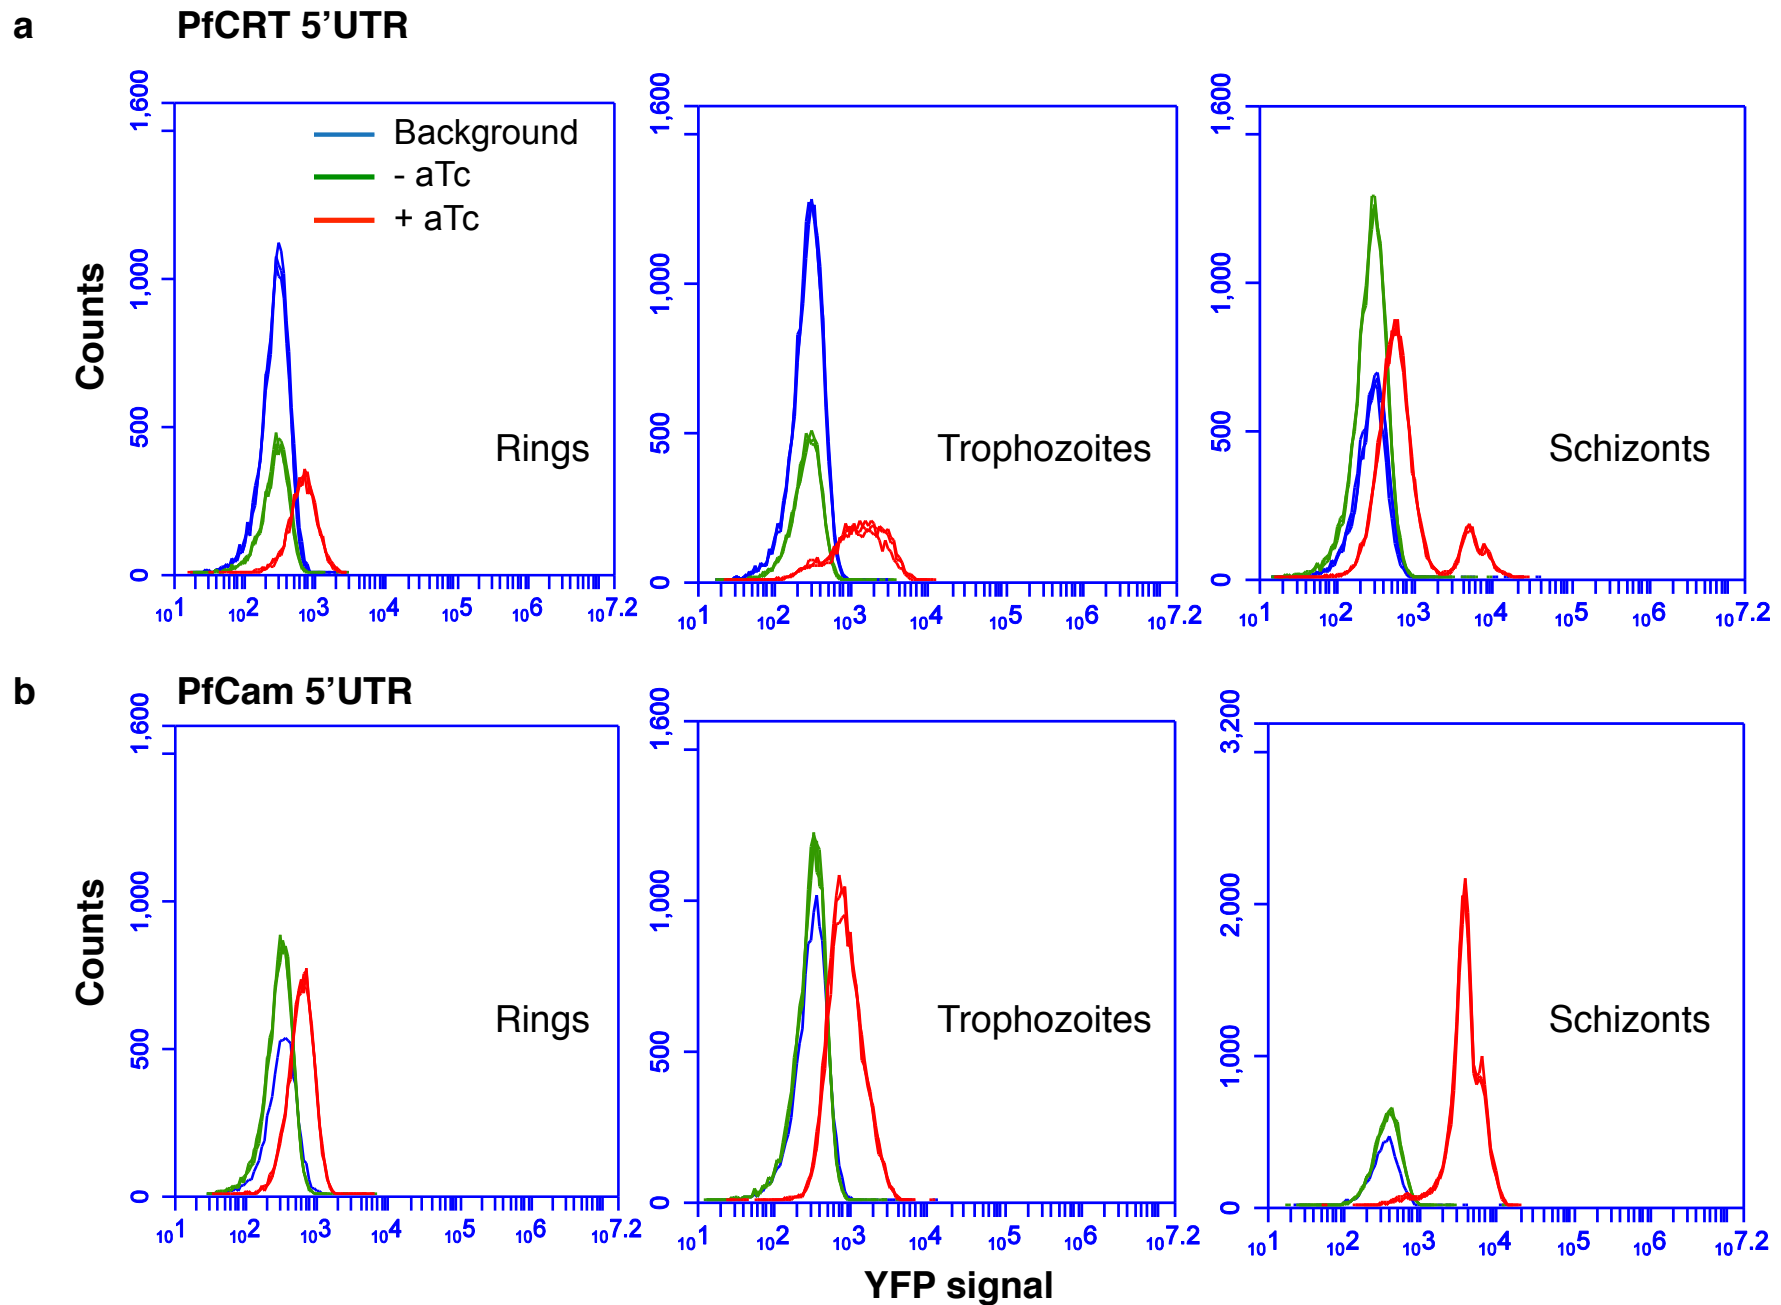

**Supplementary Figure 2. Flow cytometry histograms showing parasite developmental stage- and aTc- dependent EYFP expression controlled by TetR-DOZI.** (a) PfCRT and (b) PfCAM promoters were used to drive expression of an EYFP reporter gene flanked by a single aptamer within the 5'-UTR and ten tandem aptamers in the 3'-UTR.

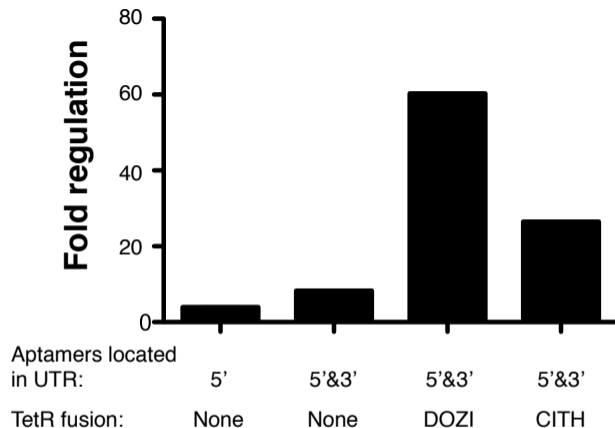

**Supplementary Figure 3. TetR fused to the *P. falciparum* CITH homolog improves the regulatory dynamic over TetR alone.** TetR-CITH regulation expression is compared with that of TetR and TetR-DOZI using a FLuc reporter flanked by a single aptamer within the 5'-UTR and ten tandem aptamers in the 3'-UTR. Regulation of FLuc by TetR via a single aptamer in the 5'UTR is included for reference.

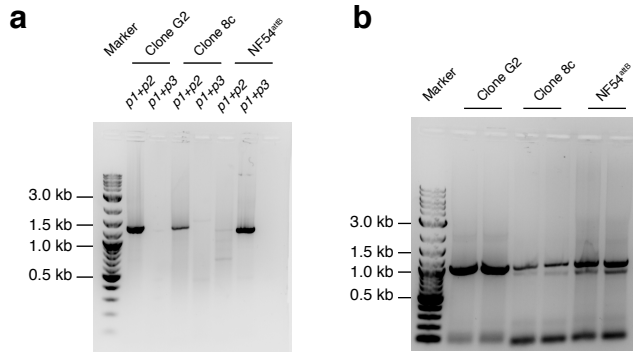

**Supplementary Figure 4. Diagnostic PCR to confirm integration of the TetR aptamer construct at the PfATP4 locus.** (a) Two clones (G2 and 8c) and the parental NF54<sup>attB</sup> strain were analyzed by PCR for integration of the aptamer-containing construct (using the *p1/p2* primer pair) or preservation of the original PfATP4 locus (using the *p1/p3* primer pair). (b) A positive control PCR reaction to amplify a region of the malate-quinone oxidoreductase (MQO) locus was used to demonstrate that all samples tested contained genomic DNA. Marker = 2-Log Ladder (New England Biolabs)

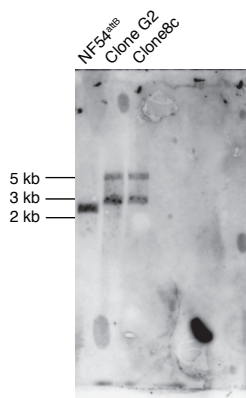

**Supplementary Figure 5. Southern blot to confirm integration of the TetR aptamer construct at the PfATP4 locus.** (a) Two clones (G2 and 8c) and the parental NF54<sup>attB</sup> strain were analyzed to determine whether the aptamer-containing construct had modified the PfATP4 locus. Genomic DNA digested with Pst1 and EcoR1 was probed to reveal products of the expected size for the parental NF54<sup>attB</sup> line (2.5 kb) and transgenic clones G2 and 8c (5 kb and 3 kb).

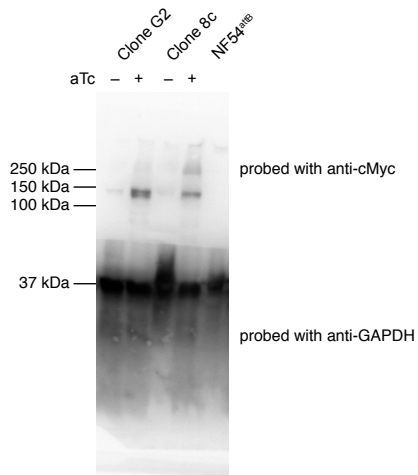

**Supplementary Figure 6. Western blot to assess aTc-dependent regulation of the PfATP4 expression.** Lysates from the transgenic clones G2 and 8c (- and + aTc) and the parental NF54<sup>attB</sup> strain were analyzed. The top half of the gel was probed with anti-Myc antibody (PfATP4 expression) and the bottom half with anti-GAPDH antibody (loading control).



**Supplementary Table 1. List of plasmids used in this study.**

| <b>Plasmid</b> | <b>Description</b>                                                                                                                                                                             | <b>GenBank Accession</b> |
|----------------|------------------------------------------------------------------------------------------------------------------------------------------------------------------------------------------------|--------------------------|
| pMG32          | PfCAM promoter driving a FLuc reporter with a single aptamer in the 5'UTR; TetR-DOZI <sub>2A</sub> RLuc <sub>2A</sub> BSD                                                                      |                          |
| pMG53          | PfCAM promoter driving a FLuc reporter with a single aptamer in the 5'UTR and 10 tandem aptamers in the 3'UTR; TetR <sub>2A</sub> RLuc <sub>2A</sub> BSD                                       |                          |
| pMG54          | PfCAM promoter driving a FLuc reporter with a single mutant aptamer in the 5'UTR and 10 tandem aptamers in the 3'UTR; TetR <sub>2A</sub> RLuc <sub>2A</sub> BSD                                |                          |
| pMG56          | PfCAM promoter driving a FLuc reporter with a single aptamer in the 5'UTR and 10 tandem aptamers in the 3'UTR; TetR-DOZI <sub>2A</sub> RLuc <sub>2A</sub> BSD                                  |                          |
| pMG57          | PfCAM promoter driving a FLuc reporter with a single mutated aptamer in the 5'UTR and 10 tandem aptamers in the 3'UTR; TetR-DOZI <sub>2A</sub> RLuc <sub>2A</sub> BSD                          |                          |
| pMG62          | PfCRT promoter driving a FLuc reporter with a single aptamer in the 5'UTR and 10 tandem aptamers in the 3'UTR; TetR-DOZI <sub>2A</sub> RLuc <sub>2A</sub> BSD                                  |                          |
| pMG83          | PfCAM promoter driving a FLuc reporter with a single aptamer in the 5'UTR and 10 tandem aptamers in the 3'UTR; TetR-CITH <sub>2A</sub> RLuc <sub>2A</sub> BSD                                  |                          |
| pMG84          | PfCRT promoter driving an EYFP reporter with a single aptamer in the 5'UTR and 10 tandem aptamers in the 3'UTR; TetR-DOZI <sub>2A</sub> RLuc <sub>2A</sub> BSD                                 |                          |
| pMG92          | PfCAM promoter driving an EYFP reporter with a single aptamer in the 5'UTR and 10 tandem aptamers in the 3'UTR; TetR-DOZI <sub>2A</sub> RLuc <sub>2A</sub> BSD                                 |                          |
| pMG75          | Allelic replacement plasmid to install a C-terminal epitope tag and 10 tandem aptamers in a 3'UTR context at the PfATP4 chromosomal locus to achieve regulated PfATP4 expression by TetR-DOZI. |                          |
| pSG372         | PfCAM promoter driving a FLuc reporter with a single aptamer in the 5'UTR; TetR <sub>2A</sub> RLuc <sub>2A</sub> BSD                                                                           |                          |

**Supplementary Table 2. List of primers used in this study.**

| <b>Primer</b> | <b>Sequence</b>                                                                            | <b>Use</b>                                                            |
|---------------|--------------------------------------------------------------------------------------------|-----------------------------------------------------------------------|
| SMG305        | tgtggtgatggtgaagaaaatccaggccatggCCAGTGAGC<br>AAGGGCGAGGAGCTGTTC                            | Forward primer<br>used to clone EYFP<br>into pMG84                    |
| SMG293        | gatcttcttcgctaatacagtttctgttcggttaaccTTACTTGTAC<br>AGCTCGTCCATGCCGAGAG                     | Reverse primer<br>used to clone EYFP<br>into pMG84                    |
| SMG307        | GTATTAATGGAACAGAAGTAGCTAAAGGA<br>GCATC                                                     | Forward primer for<br>detecting<br>integration at the<br>PfATP4 locus |
| SMG291        | ctaaatatatatccaatggcccccttccgggcgcgcccttaagCTCA<br>AATATTCAAAAATTTGT ATG TTT CTT GCT<br>TG | Forward primer for<br>cloning the PfATP4<br>homologous region         |
| SMG292        | cacagatcttcttcgctaatacagtttctgttcggttaaccgcATTCTT<br>AATAGTCATATATTTTCTTCTATATATAACC       | Reverse primer for<br>cloning the PfATP4<br>homologous region         |
| SMG286        | GTCAATTTT TAGAAGAAAGATATCCTGTAT<br>TTAGA                                                   | Forward primer for<br>amplifying the<br>housekeeping MQO<br>gene      |
| SMG358        | ATGAATAAGTGGAACATATGGAATAGATA<br>AG                                                        | Reverse primer for<br>amplifying the<br>housekeeping MQO<br>gene      |
| SMG357        | AAAAACAAGCAAAATTTTACCACATGTA<br>C                                                          | Reverse primer for<br>detecting native<br>PfATP4 locus                |
| SMG342        | actaaatatatatccaatggcccccttccgggcgcgccCATTTTG<br>TAAAAAAAATTAAAATATATTTATATAATA<br>TTAT    | Forward primer for<br>amplifying PfcAM<br>promoter/5'UTR              |
| SMG343        | ccgtccgatcgcaccttctctgcctggattgcttaagTGATATAT<br>TTCTATTAGGTATTTATTATTATAAAATATA<br>AATC   | Reverse primer for<br>amplifying PfcAM<br>promoter/5'UTR              |
| SMG255        | actaaatatatatccaatggcccccttccgggcgcgccTAGTAGT<br>TGAGTGATTCTATATACATATAC                   | Forward primer for<br>amplifying the<br>PfCRT promoter                |
| SMG256        | ccgtccgatcgcaccttctctgcctggattgcttaagTGTTATAT<br>GTAAGAAATTAACAAAAACAAAATAATAA<br>ATGAATG  | Reverse primer for<br>amplifying the<br>PfCRT promoter                |
| SMG173        | ctgggtggtggtggtggtggtggtggtggtactagtAGTTATAA<br>AACCAATTGTACGAACT                          | Forward primer<br>used to amplify                                     |

|        |                                                                                  |                                                       |
|--------|----------------------------------------------------------------------------------|-------------------------------------------------------|
|        |                                                                                  | <i>dozi</i> gene                                      |
| SMG174 | gttaataatgacacctctacctcaccactaccgctagcGGTATAT<br>AAGGATGGGTCAATTTTCG             | Reverse primer<br>used to amplify<br><i>dozi</i> gene |
| SMG164 | gtgggtctggtgggtgggtgggtgggtgggtgggtactagtTCATC<br>TGTGTCAACCTTACCTTA             | Forward primer<br>used to amplify <i>cith</i><br>gene |
| SMG165 | catgtaataatgacacctctacctcaccactaccgctagc<br>ATATGGTGGATATCTATTAAGGATTTTG<br>ATTC | Reverse primer<br>used to amplify <i>cith</i><br>gene |

Note: Nucleotides shown in lowercase correspond to the homologous region needed for Gibson Assembly cloning, while those in uppercase base pair with the target gene/region.
